# Supplementary material
Source: Royal Society of Chemistry journal article supplement (doi:10.1039/d5ma01178g)
Supplement: d5ma01178g1.pdf [file d5ma01178g1.pdf]

## Supplementary information

### Designing PANI modified PU films coupled with CNTs for the enhanced shape memory properties

Tehmeena Ishaq,<sup>a</sup> Rabia Sattar,<sup>\*a</sup> Rabia Naeem,<sup>\*b</sup> Mahwish Iqbal<sup>c</sup> and Sana Ullah<sup>d</sup>

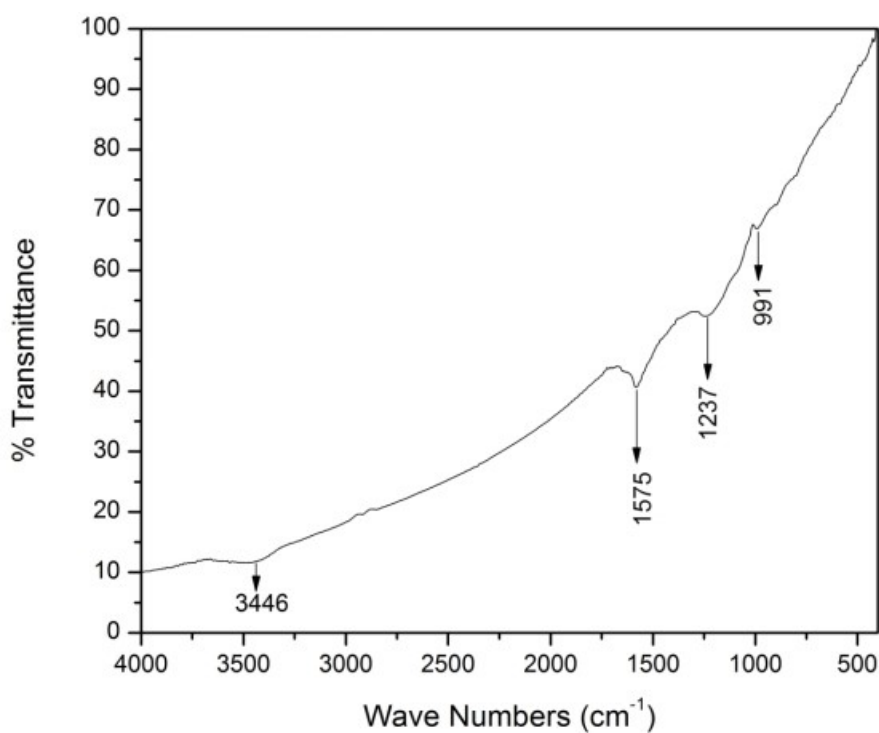

**Figure S1:** FTIR spectrum of f-CNTs

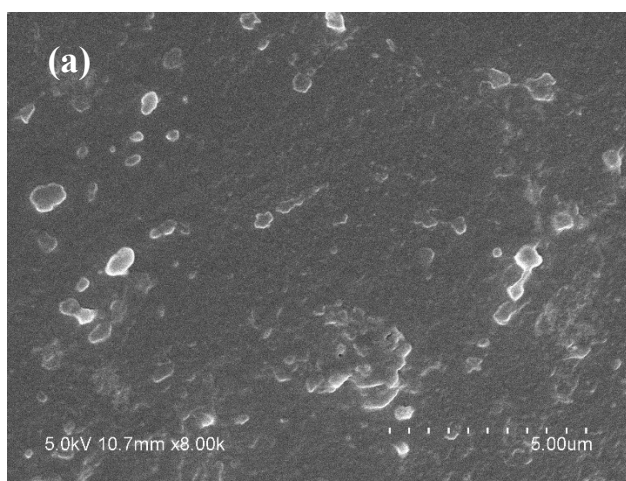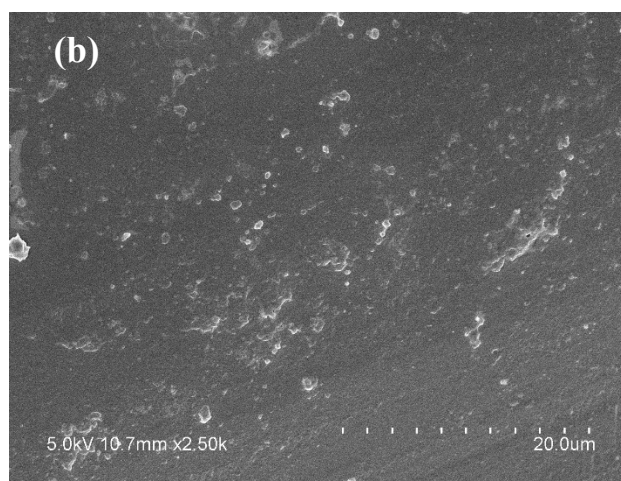

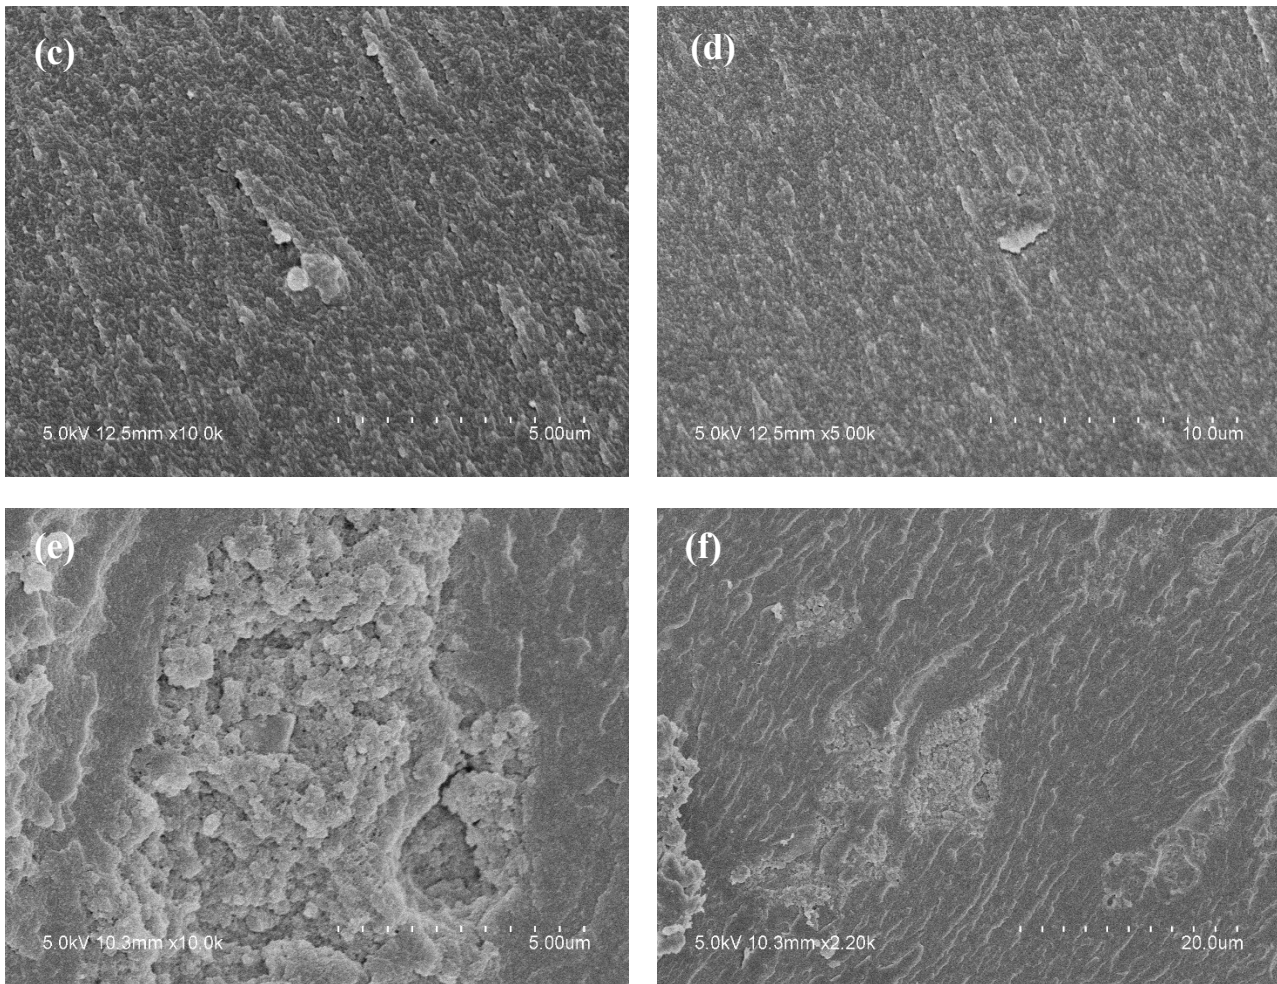

**Figure S2:** SEM of f-CNTs@PU and 0.1 %PANI/f-CNTs@PU and 1.0%PANI/f-CNTs@PU at different magnifications

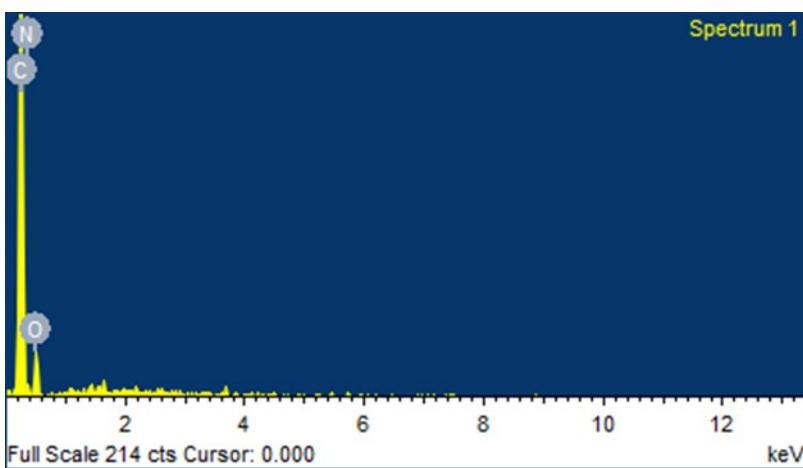

**Figure S3:** EDX spectrum of 1.0%PANI/f-CNTs@PU

**Table 1S** FTIR peaks assignment for PU, f-CNTs@PU and PANI/f-CNTs@PU

| Assignments                                | Wave number (cm <sup>-1</sup> ) |            |                |
|--------------------------------------------|---------------------------------|------------|----------------|
|                                            | PU                              | f-CNTs@PU  | PANI/f-CNTs@PU |
| Ring deformation                           | 511                             | 510        | 509            |
| $\omega$ C—H (aromatic)                    | 729–550                         | 710, 661   | 706, 660       |
| subst Aromatic Ring                        | 820 759                         | 816, 758   | 814, 756       |
| $\nu$ C—C                                  | 950                             | 948        | 933            |
| $\nu$ C—O—C                                | 1022                            | 1015       | 1005           |
| NQN (CH,CN <sup>+</sup> )                  | -                               | -          | 1109           |
| $\delta$ C—H (aromatic)                    | 1210                            | 1200       | 1198           |
| $\nu$ C—N                                  | 1245                            | 1241       | 1236           |
| $\nu$ C—O                                  | 1310                            | 1309       | 1307           |
| $\delta_{\text{sym}}$ C—H                  | 1378, 1349                      | 1375, 1347 | 1374, 1346     |
| $\delta$ CH <sub>2</sub> & CH <sub>3</sub> | 1418                            | 1416       | 1411           |
| $\delta_{\text{as}}$ C—H                   | 1460                            | 1457       | 1454           |
| $\delta$ N—H                               | 1544                            | 1541       | 1538           |
| $\nu$ C=C—C (aromatic)                     | 1600, 1514                      | 1593, 1510 | 1591, 1509     |
| $\nu$ C=O (H-bonded)                       | —                               | 1680       | 1673           |
| $\nu$ C=O (Free)                           | 1720                            | 1716       | 1707           |
| $\nu$ NCO                                  | 2353                            | —          | —              |
| $\nu_{\text{sym}}$ C—H                     | 2880                            | 2873       | 2868           |
| $\nu_{\text{as}}$ C—H                      | 2972                            | 2969       | 2967           |
| $\nu$ C—H (aromatic)                       | 3158                            | 3031       | 3028           |
| $\nu$ N—H                                  | 3430–3250                       | 3361       | 3332           |

subst = substituted, as = asymmetric, sym = symmetric,  $\omega$  = out-of-plane bending,  $\delta$  = in-plane bending,  $\nu$  = stretch, NQN=Q= quinone, NQN (CH,CN<sup>+</sup>)

**Table 2S** Mechanical properties of PU and f-CNTs@PU and PANI/f-CNTs@PU composite films

| Sample Code        | Ultimate Tensile Strength (MPa) | Elongation at Break (%) | Young's Modulus (MPa) |
|--------------------|---------------------------------|-------------------------|-----------------------|
| PU                 | 16.36 ± 0.49                    | 7.93 ± 0.32             | 299.29 ± 8.98         |
| f-CNTs@PU          | 21.16 ± 0.63                    | 10.15 ± 0.41            | 423.79 ± 12.71        |
| 0.1%PANI/f-CNTs@PU | 26.49 ± 0.79                    | 18.35 ± 0.73            | 456.49 ± 13.69        |
| 0.3%PANI/f-CNTs@PU | 25.55 ± 0.77                    | 11.05 ± 0.44            | 414.62 ± 12.44        |
| 0.5%PANI/f-CNTs@PU | 23.41 ± 0.70                    | 14.10 ± 0.56            | 363.65 ± 10.90        |
| 1.0%PANI/f-CNTs@PU | 13.65 ± 0.41                    | 4.95 ± 0.20             | 324.44 ± 9.73         |

**Table 3S** TGA results of pristine PU and f-CNTs@PU and PANI/f-CNTs@PU composite films

| Sample Code         | 1 <sup>st</sup> Step Degradation |                     |                       | 2 <sup>nd</sup> Step Degradation |                     |                       | Y <sub>c</sub> at 700 °C (wt. %) |
|---------------------|----------------------------------|---------------------|-----------------------|----------------------------------|---------------------|-----------------------|----------------------------------|
|                     | T <sub>o</sub> (°C)              | T <sub>e</sub> (°C) | T <sub>max</sub> (°C) | T <sub>o</sub> (°C)              | T <sub>e</sub> (°C) | T <sub>max</sub> (°C) |                                  |
| PU                  | 320.81                           | 429.38              | 409.87                | 429.38                           | 534.93              | 482.30                | 16.83                            |
| f-CNTs@PU           | 323.24                           | 431.11              | 413.27                | 431.11                           | 544.86              | 485.91                | 19.41                            |
| 0.1 %PANI/f-CNTs@PU | 328.46                           | 434.64              | 412.26                | 434.64                           | 555.12              | 489.44                | 19.35                            |
| 0.3 %PANI/f-CNTs@PU | 331.32                           | 442.21              | 420.91                | 442.21                           | 563.70              | 495.07                | 19.35                            |
| 0.5 %PANI/f-CNTs@PU | 335.19                           | 446.08              | 421.26                | 446.08                           | 565.55              | 500.52                | 21.03                            |
| 1.0 %PANI/f-CNTs@PU | 341.91                           | 452.81              | 431.29                | 452.81                           | 569.42              | 502.72                | 19.36                            |

T<sub>o</sub>: Temperature for on-set decomposition, T<sub>e</sub>: Temperature for end-set decomposition, T<sub>max</sub>: Temperature for maximum decomposition, Y<sub>c</sub>: weight of polymer remained/Char yield.

**Table 4S** DSC data of decomposition of PU, f-CNTs@PU and PANI/f-CNTs@PU composite films

| Sample Code         | T <sub>g</sub> (°C) | T <sub>m</sub> (°C) | ΔH <sub>m</sub> (J g <sup>-1</sup> ) | T <sub>c</sub> (°C) | ΔH <sub>c</sub> (J g <sup>-1</sup> ) |
|---------------------|---------------------|---------------------|--------------------------------------|---------------------|--------------------------------------|
| PU                  | 5.28                | 56.94               | 3.97                                 | 17.58               | 3.44                                 |
| f-CNTs@PU           | 7.46                | 59.29               | 4.24                                 | 35.59               | 3.57                                 |
| 0.1 %PANI/f-CNTs@PU | 8.49                | 61.16               | 3.26                                 | 41.47               | 3.51                                 |
| 0.3 %PANI/f-CNTs@PU | 8.27                | 60.90               | 3.96                                 | 41.07               | 3.02                                 |
| 0.5 %PANI/f-CNTs@PU | 7.81                | 60.73               | 3.72                                 | 40.40               | 2.80                                 |
| 1.0 %PANI/f-CNTs@PU | 7.76                | 60.65               | 1.32                                 | 39.78               | 1.13                                 |

T<sub>g</sub>: Glass transition temperature, T<sub>m</sub>: Melting temperature, ΔH<sub>m</sub>: Heat of melting

T<sub>c</sub>: Crystallization temperature, ΔH<sub>c</sub>: Heat of crystallization

**Table 5S** Electrical conductivity (S cm<sup>-1</sup>), shape recovery (%) and shape fixity of PU, f-CNTs@PU and PANI/f-CNTs@PU composite films.

| Sample Code         | Electrical Conductivity (S cm <sup>-1</sup> ) | Shape Recovery (%) | Shape Fixity (%) |
|---------------------|-----------------------------------------------|--------------------|------------------|
| PU                  | 4.06 × 10 <sup>-7</sup>                       | 83                 | 87               |
| f-CNTs@PU           | 5.30 × 10 <sup>-6</sup>                       | 86                 | 88               |
| 0.1 %PANI/f-CNTs@PU | 1.68 × 10 <sup>-4</sup>                       | 87                 | 91               |
| 0.3 %PANI/f-CNTs@PU | 2.49 × 10 <sup>-4</sup>                       | 89                 | 92               |
| 0.5 %PANI/f-CNTs@PU | 2.60 × 10 <sup>-4</sup>                       | 92                 | 95               |
| 1.0 %PANI/f-CNTs@PU | 5.00 × 10 <sup>-2</sup>                       | 97                 | 98               |

**Table 6S** A concise comparison of CNTs, PU and other conducting polymer hybrids showing shape recovery and electrical conductivity values.

| Sr No | Material name     | Conducting polymer | Filler               | Fabrication technique                     | Shape memory actuation | Shape recovery (%) | Electrical Conductivity (S cm <sup>-1</sup> )     | Ref          |
|-------|-------------------|--------------------|----------------------|-------------------------------------------|------------------------|--------------------|---------------------------------------------------|--------------|
| 1     | PU                | Pth (0.1-1% wt)    | -                    | Solution mixing                           | thermal                | 80-85              | -                                                 | [1]          |
| 2     | PU                | Pth (0.1-1% wt)    | CNTs                 | In situ polymerization                    | thermal                | 89-92              | -                                                 | [1]          |
| 3     | PU                | PCL                | Amine trimer (1% wt) | -                                         | electrical             | 95                 | 10 <sup>-5</sup> - 10 <sup>-3</sup>               | [2]          |
| 4     | PEO/P(P-E-P)G/TDI | Ppy (0.1-1% wt)    | -                    | In situ polymerization +Solution blending | thermal                | 85-89              | 3.48 × 10 <sup>-6</sup> - 2.84 × 10 <sup>-4</sup> | [3]          |
| 5     | PEO/P(P-E-P)G/TDI | Ppy (0.1-1% wt)    | f-CNTs               | In situ polymerization +Solution blending | thermal                | 87.7-94            | 7.69 × 10 <sup>-4</sup> - 6.25 × 10 <sup>-2</sup> | [3]          |
| 6     | PU                | PCL                | Graphene             | Mechanical compounding                    | Electrical/thermal     | 87                 | 10 <sup>-2</sup>                                  | [4]          |
| 7     | PU                | Poly lactide (PLA) | CNTs                 | Melt blending                             | thermal                | 90                 | 10 <sup>-3</sup>                                  | [5]          |
| 8     | PU                | -                  | 2%RGO                | -                                         | thermal                | 89                 | 10 <sup>-2</sup>                                  | [6]          |
| 9     | PU                | -                  | CNTs                 | Melt compounding                          | thermal                | 71                 | 10 <sup>-3</sup>                                  | [7]          |
| 10    | PVA               | -                  | 10% CNTs             | Simple casting                            | thermal                | 70                 | 10 <sup>-3</sup>                                  | [8]          |
| 11    | PU                | PANI (0.1-1% wt)   | f-CNTs               | In situ polymerization                    | thermal                | 84-98              | 1.68 × 10 <sup>-4</sup> - 5.00 × 10 <sup>-2</sup> | Current work |

## References

1. Sattar, R., A. Kausar, and M. Siddiq, *Influence of conducting polymer on mechanical, thermal and shape memory properties of polyurethane/polythiophene blends and nanocomposite*. *Advanced Materials Letters*, 2016. **7**(4): p. 282-288.
2. Shaabani, A. and R. Sedghi, *Synthesis of shape memory electroconductive polyurethane with self-healing capability as an intelligent biomedical scaffold for bone tissue engineering*. *Polymer*, 2021. **223**: p. 123694.
3. Sattar, R., A. Kausar, and M. Siddiq, *Shape memory and physical properties of composites of polyethylene oxide/poly (propylene glycol)-block-poly (ethylene glycol)-block-poly (propylene glycol)/2, 4-toluene diisocyanate, polypyrrole, and modified MWCNT*. *Polymer-Plastics Technology and Engineering*, 2016. **55**(11): p. 1099-1114.
4. Zhang, Z.-x., et al., *Electrically/infrared actuated shape memory composites based on a bio-based polyester blend and graphene nanoplatelets and their excellent self-driven ability*. *Journal of Materials Chemistry C*, 2017. **5**(17): p. 4145-4158.
5. Liu, T., et al., *Facile preparation of rapidly electro-active shape memory thermoplastic polyurethane/polylactide blends via phase morphology control and incorporation of conductive fillers*. *Polymer*, 2017. **114**: p. 28-35.

6. Kim, J., et al., *Electroactive shape memory performance of polyurethane/graphene nanocomposites*. *Reactive and functional polymers*, 2015. **88**: p. 1-7.
7. Chen, J., et al., *Carbon nanotube network structure induced strain sensitivity and shape memory behavior changes of thermoplastic polyurethane*. *Materials & Design*, 2015. **69**: p. 105-113.
8. Du, F.-P., et al., *Electroactive shape memory polymer based on optimized multi-walled carbon nanotubes/polyvinyl alcohol nanocomposites*. *Composites Part B: Engineering*, 2015. **68**: p. 170-175.

### **Data availability statement**

The data supporting this article have been included as part of the Supplementary Information.
